# Supplementary material for: Clinical Characteristics of Severe COVID-19 Patients Admitted to an Intensive Care Unit in Lombardy During the Italian Pandemic
Source: Front Med (Lausanne). 2021 Mar 25;8:582896. doi: 10.3389/fmed.2021.582896 (PMC8027304; doi:10.3389/fmed.2021.582896)
Supplement: Supplementary file 1 [file Table_1.XLSX]

## Sheet: SPSS
ID	Age	Gender	Weight	BMI	Outcome	Outcome	Total length of ICU stay	Total infections	CCI	SOFA	SARS-CoV-2 transmission	SARS-CoV-2 transmission	ENOXAPARIN (U/12h)	PTT att. T0	PTT att. T1	PTT att. T2	MEAN	Δ1-0	Δ2-0	PTT ratio T0	PTT ratio T1	PTT ratio T2	MEAN	Δ1-0	Δ2-0	PT att. T0	PT att. T1	PT att. T2	MEAN	Δ1-0	Δ2-0	PT --- T0	PT --- T1	PT --- T2	MEAN	Δ1-0	Δ2-0	INR T0	INR T1	INR T2	MEAN	Δ1-0	Δ2-0	AT III T0	AT III T1	AT III T2	MEAN	Δ1-0	Δ2-0
001	69.5715	0	85	29.4118	Nonsurvivor	0	19	3	3	6	P-A	0	6000	31	34	31	32	3	0	1.12	1.21	1.11	1.1	-0.1	-0.23	18.5	18.7	19.4	18.8667	0.2	0.9	66	65	61	64	-1	-5	1.4	1.4	1.5	1.43333	0	0.1	57	60	56	57.6667	3	-1
002	67.707	0	85	27.7551	Survivor	1	35	3	5	7	P-A	0	6000	37	34	33	34.6667	-3	-4	1.32	1.21	1.18	1.2	-0.03	0	17	16.2	17.5	16.9	-0.8	0.5	74	80	70	74.6667	6	-4	1.3	1.2	1.3	1.26667	-0.1	0	87	93	85	88.3333	6	-2
003	69.7248	0	70	24.2215	Nonsurvivor	0	13	1	3	7	P-A	0	4000	29	30	28	29	1	-1	1.05	1.08	1	1.01333	-0.08	-0.12	23	19	17.4	19.8	-4	-5.6	48	63	72	61	15	24	1.8	1.5	1.3	1.53333	-0.3	-0.5	62	73	66	67	11	4
004	59.2553	0	110	38.0623	Survivor	1	26	3	5	8	P-A	0	6000	25	25	25	25	0	0	0.88	0.88	0.9	0.89	0.02	0.01	15.5	15.3	15.9	15.5667	-0.2	0.4	83	86	82	83.6667	3	-1	1.2	1.1	1.2	1.16667	-0.1	0	128	128	133	129.667	0	5
005	60.5448	0	92	31.0979	Survivor	1	8	0	2	3	P-A	0	6000	30	29	28	29	-1	-2	1.09	1.02	0.99	1	-0.03	-0.03	17.5	16.6	16.2	16.7667	-0.9	-1.3	71	75	80	75.3333	4	9	1.3	1.3	1.2	1.26667	0	-0.1	104	110	114	109.333	6	10
006	43.6605	1	85	30.478	Survivor	1	14	0	0	4	P-A	0	6000	32	33	32	32.3333	1	0	1.15	1.16	1.16	1.16333	0	0.01	18.8	20	19.4	19.4	1.2	0.6	64	59	62	61.6667	-5	-2	1.4	1.5	1.5	1.46667	0.1	0.1	92	99	90	93.6667	7	-2
007	84.1013	1	56	23.3091	Nonsurvivor	0	19	3	5	3	H-A	1	4000	34	34	33	33.6667	0	-1	1.2	1.21	1.19	1.18667	-0.02	-0.05	16.1	16.2	17.1	16.4667	0.1	1	80	80	72	77.3333	0	-8	1.2	1.2	1.3	1.23333	0	0.1	69	71	75	71.6667	2	6
008	78.59	1	54	22.4766	Nonsurvivor	0	15	1	5	3	H-A	1	4000	28	29	36	31	1	8	0.99	1.03	1.28	1.11667	0.25	0.01	17.2	17.7	19.8	18.2333	0.5	2.6	72	69	60	67	-3	-12	1.3	1.4	1.5	1.4	0.1	0.2	61	62	54	59	1	-7
009	76.0767	0	75	25.9516	Nonsurvivor	0	23	3	5	8	P-A	0	4000	36	34	38	36	-2	2	1.3	1.21	1.35	1.30333	0.14	0.14	24.3	27.7	35	29	3.4	10.7	45	37	26	36	-8	-19	1.9	2.2	2.9	2.33333	0.3	1	79	90	92	87	11	13
010	59.0007	0	85	29.4118	Survivor	1	20	2	1	8	P-A	0	6000	25	23	24	24	-2	-1	0.88	0.83	0.84	0.816667	0.01	-0.05	15.1	14.2	14.5	14.6	-0.9	-0.6	86	96	91	91	10	5	1.1	1	1.1	1.06667	-0.1	0	90	102	89	93.6667	12	-1
011	56.6598	0	85	27.7551	Survivor	1	21	3	3	8	P-A	0	6000	30	30	28	29.3333	0	-2	1.07	1.08	0.99	0.983333	-0.09	-0.2	16.5	14.7	14.6	15.2667	-1.8	-1.9	76	92	90	86	16	14	1.2	1.1	1.1	1.13333	-0.1	-0.1	87	91	111	96.3333	4	24
012	64.7912	0	85	26.2346	Survivor	1	9	1	3	10	P-A	0	4000	21	23	23	22.3333	2	2	0.74	0.81	0.84	0.833333	0.03	0.04	15.4	14.3	14.5	14.7333	-1.1	-0.9	83	92	91	88.6667	9	8	1.2	1.1	1.1	1.13333	-0.1	-0.1	89	96	85	90	7	-4
013	67.5921	0	68	23.8087	Nonsurvivor	0	7	2	8	5	H-A	1	4000	28	31	32	30.3333	3	4	1	1.11	1.13	1.19333	0.02	0.23	16.4	16.1	16.6	16.3667	-0.3	0.2	78	80	75	77.6667	2	-3	1.2	1.2	1.3	1.23333	0	0.1	100	91	93	94.6667	-9	-7
014	72.0082	1	65	25.3906	Nonsurvivor	0	13	0	7	7	P-A	0	4000	27	23	23	24.3333	-4	-4	0.95	0.83	0.81	0.82	-0.02	-0.01	17.4	15.1	14.3	15.6	-2.3	-3.1	72	88	92	84	16	20	1.3	1.1	1.1	1.16667	-0.2	-0.2	65	85	98	82.6667	20	33
015	71.4743	0	67	21.8776	Nonsurvivor	0	23	3	4	10	P-A	0	4000	24	23	24	23.6667	-1	0	0.84	0.82	0.86	0.86	0.04	0.08	17.4	14.9	15	15.7667	-2.5	-2.4	72	87	89	82.6667	15	17	1.3	1.1	1.1	1.16667	-0.2	-0.2	69	85	88	80.6667	16	19
016	67.2882	0	70	22.8571	Nonsurvivor	0	20	2	4	7	P-A	0	4000	31	28	26	28.3333	-3	-5	1.11	0.99	0.95	0.953333	-0.04	-0.07	15.8	15.1	15.7	15.5333	-0.7	-0.1	81	86	83	83.3333	5	2	1.2	1.1	1.2	1.16667	-0.1	0	81	92	101	91.3333	11	20
018	67.8056	0	70	22.8571	Nonsurvivor	0	15	2	5	8	H-A	1	4000	43	43	38	41.3333	0	-5	1.53	1.53	1.36	1.36667	-0.17	-0.32	18.9	19.6	19.6	19.3667	0.7	0.7	63	61	60	61.3333	-2	-3	1.5	1.5	1.5	1.5	0	0	89	96	80	88.3333	7	-9
019	84.0411	1	70	27.3437	Nonsurvivor	0	9	1	5	8	H-A	1	4000	40	42	37	39.6667	2	-3	1.43	1.48	1.31	1.33333	-0.17	-0.27	14.9	13.6	13.9	14.1333	-1.3	-1	87	103	99	96.3333	16	12	1.1	1	1	1.03333	-0.1	-0.1	68	62	58	62.6667	-6	-10
[truncated: 168 more columns]
